# Supplementary material
Source: PubMed Central journal article supplement (PMC5394864)
Supplement: d5bac3740cc1ce4c9f36f9af576aacad_2016_149278-Disclosures_and_Contributions.pdf [file d5bac3740cc1ce4c9f36f9af576aacad_2016_149278-Disclosures_and_Contributions.pdf]

Haematologica  
HAEMATOL/2016/149278  
Version 3

Interleukin-6 receptor-alpha signaling drives anti-RBC alloantibody production and T follicular helper cell differentiation in a murine model of red blood cell alloimmunization

Abhinav Arneja, Juan E. Salazar, Wenyu Jiang, Jeanne E. Hendrickson, James C. Zimring, and Chance John Luckey

Disclosures: J.C.Z. has a sponsored research agreement with Immucor Inc and is on the scientific advisory board of Rubius Therapeutics, and both of these are unrelated to the topic of the current manuscript. The other authors have no conflict of interests.

Contributions: A.A., J.E.S. and W.J. performed the experiments. A.A. and C.J.L. designed the experiments, analyzed and interpreted the data, and wrote the manuscript. J.C.Z. and J.E.H. provided mice and reagents, helpful discussions, and critically reviewed the manuscript.
